# Supplementary material
Source: ML conference proceedings conference paper supplement (https://proceedings.neurips.cc/paper_files/paper/2009/hash/f7664060cc52bc6f3d620bcedc94a4b6-Abstract.html)
Supplement: Supplementary file [file f7664060cc52bc6f3d620bcedc94a4b6-Supplemental.zip]

On the next page, you will see some words. Each word has a category label “A” or “B” below it. The order in which the words are arranged does not matter.

You will have three minutes to study them. The reason why each word has the particular category label may not be obvious. Later we will ask you to use what you learned to categorize more words into “A” or “B”.

STOP. Wait for signal to start.

fun palace earth blanket snow  
A B A B A

---

Please complete the following equations:

- $81 - 16 =$

- $91 + 97 =$

- $13 - 96 =$

- $91 + 49 =$

- $63 - 80 =$

- $10 + 14 =$

- $28 - 42 =$

- $55 + 92 =$

- $96 - 79 =$

- $96 + 96 =$

|                                                     |
|-----------------------------------------------------|
| IMPORTANT: YOU MUST CATEGORIZE EACH AND EVERY WORD. |
|-----------------------------------------------------|

All words must be categorized as either "A" or "B". Guess if you have to.

|           |           |           |           |           |          |
|-----------|-----------|-----------|-----------|-----------|----------|
| fun       | snow      | palace    | blanket   | earth     | screech  |
| lollipop  | heart     | bracelet  | flesh     | burden    | cage     |
| greed     | day       | letter    | pet       | water     | summer   |
| cockroach | siren     | infant    | bye       | hospital  | ocean    |
| stampede  | lake      | joke      | tulip     | sunburn   | accident |
| infant    | carnage   | dove      | aid       | artist    | foul     |
| lollipop  | intellect | thief     | sex       | guilt     | bee      |
| prisoner  | accident  | gem       | cockroach | essay     | kiss     |
| trust     | shot      | chocolate | letter    | music     | gown     |
| lollipop  | fireworks | blade     | shame     | malice    | polio    |
| tyranny   | day       | shower    | greed     | rifle     | accident |
| burglar   | aid       | injury    | pie       | scar      | prisoner |
| wife      | bouquet   | burglar   | malice    | satin     | mosquito |
| sunset    | sky       | chapel    | daylight  | insult    | sky      |
| invader   | dolphin   | skull     | feast     | limousine | spider   |
| pistol    | calculus  | singer    | shame     | revolver  | holiday  |
| team      | shot      | joviality | tornado   | accident  | tornado  |
| dungeon   | woe       | pup       |           |           |          |

Please answer the following questions.

- Tell us any insights or hypotheses you may have about the categories.

- On a scale of 1 to 10 (1 = most unsure, 10 = I'm certain), rate your confidence on your insights/hypotheses.
